Urol Int , DOI: 10.1159/000553150

Received: January 12, 2026

Accepted: June 10, 2026

Published online: June 18, 2026

## **Intraoperative Doppler Verification of Arterial Occlusion in Minimally Invasive Renal Resection**

Bartoš Veselá A, Kolář J, Sedláčková H, Pitra T, Stránský Jr P, Üрге T, Trávníček I, Ferda J, Pivovarčíková K, Hora M

ISSN: 0042-1138 (Print), eISSN: 1423-0399 (Online)

<https://www.karger.com/UIN>

Urologia Internationalis

### Disclaimer:

Accepted, unedited article not yet assigned to an issue. The statements, opinions and data contained in this publication are solely those of the individual authors and contributors and not of the publisher and the editor(s). The publisher and the editor(s) disclaim responsibility for any injury to persons or property resulting from any ideas, methods, instructions or products referred to the content.

### Copyright:

This article is licensed under the Creative Commons Attribution 4.0 International License (CC BY) (<https://karger.com/Services/OpenAccessLicense>). Usage, derivative works and distribution are permitted provided that proper credit is given to the author and the original publisher.

© 2026 The Author(s). Published by S. Karger AG, Basel

# Intraoperative Doppler Verification of Arterial Occlusion in Minimally Invasive Renal Resection

Adriana Bartoš Veselá<sup>1</sup>, Jiří Kolář<sup>1</sup>, Hana Sedláčková<sup>1</sup>, Tomáš Pitra<sup>1</sup>, Petr Stránský jr.<sup>1</sup>, Tomáš Ürge<sup>1</sup>, Ivan Trávníček<sup>1</sup>, Jiří Ferda<sup>2</sup>, Kristýna Pivovarčíková<sup>3,4</sup>, Milan Hora<sup>1</sup>

<sup>1</sup>Department of Urology, Faculty of Medicine, Charles University and University Hospital Pilsen

<sup>2</sup>Department of Imaging Methods, Faculty of Medicine, Charles University and University Hospital Pilsen

<sup>3</sup>Šikl Institute of Pathology, Faculty of Medicine Pilsen, Charles University and University Hospital Pilsen

<sup>4</sup>Biopsticka laboratory s.r.o., Pilsen, Czech Republic

Short Title: **DUSG for Verification of Renal Ischemia During Partial Nephrectomy**

## Correspondence Address:

Adriana Bartoš Veselá MD

Department of Urology

Medical Faculty and Charles University Hospital Pilsen

Edvarda Beneše 13, 301 00 Pilsen

Czech Republic

E-mail: bartosa@fnplzen.cz

## ABSTRACT

**Introduction:** Doppler ultrasonography (DUSG) enables intraoperative assessment of renal perfusion during partial nephrectomy. This study evaluated the feasibility of DUSG and compared its outcomes with indocyanine green (ICG) fluorescence imaging and a control group (CG) without intraoperative perfusion imaging.

**Methods:** We retrospectively analyzed 426 patients undergoing minimally invasive partial nephrectomy between 2018 and July 2025. Ischemia verification was performed using DUSG in 174 patients (41%) and ICG in 29 patients (7%). The control group included 223 patients (52%). Selection of imaging modality depended on surgeon preference and intraoperative findings. Perioperative, oncological, and functional outcomes were analyzed using one-way ANOVA and chi-square tests.

**Results:** No significant differences were observed in tumor size, BMI, warm ischemia time, blood loss, RENAL score, or complication severity assessed by the Clavien–Dindo classification. Selective clamping and clamp adjustment were significantly more frequent in the DUSG and ICG groups compared with controls (both  $p < 0.001$ ). Positive surgical margin rates were low and comparable between groups.

**Conclusion:** Both DUSG and ICG represent safe and effective methods for ischemia verification; however, DUSG offers the advantages of lower cost, wider availability, and no risk of contrast-related adverse reactions, making it a practical option for routine clinical use.

**Key words:** partial nephrectomy, arterial occlusion, Doppler ultrasonography, Indocyanine green, fluorescence imaging, selective clamping, renal cell carcinoma

## INTRODUCTION

Renal cell carcinoma (RCC) is the 14th most common cancer worldwide [1], with the Czech Republic consistently ranking among the countries with the highest incidence. According to the Czech National Cancer Registry, 3033 new cases were diagnosed in 2021. The rising incidence with stable mortality in developed countries is likely attributable to the widespread use of imaging modalities, enabling detection of early-stage tumors, particularly stage I [2].

The gold standard for the treatment of localized RCC is surgical treatment, either radical nephrectomy (RN) or partial nephrectomy (PN) [3]. Advances in surgical techniques, together with increasing surgeon expertise, have led to the development of minimally invasive approaches, primarily laparoscopic and robot-assisted procedures. Meta-analyses confirm the advantages of robot-assisted PN over the laparoscopy, particularly shorter warm ischemia time (WIT) and lower conversion rates, even in technically demanding and anatomically complex tumors [4–6].

PN is the preferred treatment for localized T1 renal tumors when technically feasible, with the aim of maximizing renal function preservation and minimizing the risk of chronic kidney disease [7,8]. The procedure is usually performed with temporary clamping of the main renal artery, however, alternatives include resection without clamping (the off-clamp technique) or selective clamping of segmental branches supplying the tumor [9,10]. According to the European Association of Urology (EAU), these alternatives are recommended only in selected cases, such as in patients with chronic kidney disease, a solitary kidney, or multifocal tumors [11]. In cases with complex vascular anatomy, challenging hilar dissection, or selective clamping, intraoperative imaging techniques can help to verify ischemia in the tumor area. This study evaluates our center's experience with Doppler ultrasonography (DUSG) and indocyanine green (ICG) fluorescence imaging for intraoperative ischemia assessment and compares outcomes with a control group (CG) without imaging. While ICG fluorescence imaging is increasingly used in robot-assisted surgery, data regarding the use of DUSG for intraoperative perfusion assessment remain limited. Therefore, the primary aim of our study was to evaluate whether DUSG represents a safe and reliable method for ischemia verification during minimally invasive partial nephrectomy. These findings may be particularly relevant for centers with limited technical resources or without routine access to advanced fluorescence imaging systems.

## METHODOLOGY

We retrospectively analyzed patients who underwent minimally invasive PN for tumors at the Urology Clinic of the University Hospital in Pilsen between 2018 and July 2025.

Patients who required conversion to open surgery or radical nephrectomy were excluded, as were those undergoing resection without renal hilum clamping.

A total of 426 patients were included. Intraoperative ischemia verification was performed using DUSG (n = 174; 41%) or fluorescence imaging with ICG Verdyne® (1.25–2.5 mg; ICG; n = 29; 7%). The control group (CG) consisted of patients who underwent surgery without intraoperative imaging (n = 223; 52%).

Laparoscopic resection was performed in 149 patients (35%), while following introduction of the da Vinci Xi robotic system in June 2020, the majority of procedures were robot-assisted (n = 277; 65%). Seven patients (2%) underwent resection on a solitary kidney, and a retroperitoneoscopic approach was used in 9 cases (2%).

In our cohort, intraoperative perfusion assessment was used selectively, mainly in cases with complex vascular anatomy, challenging hilar dissection, selective clamping, or when ischemia was not clearly identifiable on macroscopic inspection. The choice of imaging modality (DUSG vs. ICG) primarily depended on the operating surgeon's preference and experience. At our institution, ICG fluorescence imaging was used by a limited number of surgeons, whereas DUSG represented the preferred modality for routine intraoperative ischemia verification. Tumor complexity was evaluated using the RENAL nephrometry score and postoperative renal function was assessed using estimated glomerular filtration rate (eGFR).

Selective clamping was defined as clamping of segmental branches supplying the tumor. Clamp adjustment was defined as any intraoperative modification of vascular control, including repositioning of the clamp, addition of a clamp, or conversion from selective to global ischemia.

During the study period, a robotic surgical system (da Vinci Xi) was gradually introduced at our institution. To account for potential confounding related to this transition and the associated learning curve, subgroup analyses were performed separately for laparoscopic and robot-assisted procedures.

For statistical evaluation, continuous variables were compared across the three groups using one-way analysis of variance (ANOVA) with Tukey post-hoc analysis. Categorical variables were analyzed using the chi-square test. A p-value < 0.05 was considered statistically significant.

## RESULTS

An overview of the definitive histological results is provided in Table 1.

No statistically significant differences were observed between the study groups regarding BMI, tumor size, warm ischemia time, blood loss, RENAL nephrometry score, or overall complication severity assessed by the Clavien–Dindo classification in the overall cohort (Tables 2–4).

In contrast, significant differences were identified in patient age, operative time, and postoperative renal function assessed by eGFR. Patients in the ICG group were significantly younger than those in the DUSG and control group ( $p < 0.001$ ). Operative time also differed significantly between groups ( $p = 0.002$ ), with the shortest procedures observed in the ICG cohort. Post-hoc analysis demonstrated significant differences between the ICG and DUSG groups, whereas the control group did not differ significantly from either imaging modality. A statistically significant difference in postoperative eGFR was observed between groups ( $p = 0.046$ ), with higher postoperative values in the ICG cohort.

Selective clamping was performed significantly more frequently in patients undergoing intraoperative perfusion assessment than in the control group, particularly in the ICG cohort ( $p < 0.001$ ). Similarly, the need for intraoperative clamp adjustment was significantly higher in the DUSG and ICG groups compared with controls ( $p < 0.001$ ).

The rate of positive surgical margins (pR1) was low and did not differ significantly between groups, supporting comparable oncological safety across all approaches.

During the study period, robot-assisted surgery was introduced at our institution, and therefore subgroup analyses were performed separately for laparoscopic and robot-assisted procedures. In the laparoscopic subgroup, perioperative outcomes were generally comparable between groups, with the exception of a significantly higher Clavien–Dindo score in the DUSG group ( $p = 0.007$ ). However, this difference was not observed in the overall cohort or in the robot-assisted subgroup. In the robot-assisted subgroup, patients in the ICG cohort remained significantly younger than those in the DUSG and control groups, while no significant differences were identified in tumor complexity, operative time, warm ischemia time, renal function, or complication rates. Importantly, the significantly higher rates of selective clamping and reclamping in the DUSG and ICG groups persisted in both subgroup analyses.

In one patient, both DUSG and ICG fluorescence imaging were used simultaneously. The patient presented with two renal arteries, and residual perfusion was detected by DUSG following sequential clamping of each artery. Subsequent administration of 2.5 mg Verdyne<sup>®</sup> confirmed ischemia of the tumor-bearing lower renal pole during clamping of the lower pole artery. Histopathological examination revealed angiomyolipoma.

Detailed perioperative and subgroup analyses are summarized in Tables 2–4.

## DISCUSSION

Minimally invasive PN has become the standard treatment modality for localized renal carcinoma, particularly for tumors up to 7 cm (stage T1) [12]. The introduction of robot-assisted surgery has significantly expanded the technical capabilities of surgeons, improving resection precision, the safety of vascular clamping, and intraoperative visualization.

### Preoperative diagnosis and treatment planning

Safe performance of PN requires careful preoperative preparation, including evaluation of tumor size, location, its relationship to vascular structures, and anatomical conditions within the renal hilum.

The current gold standard for preoperative imaging remains contrast-enhanced spiral computed tomography (CT) with angiography. In anatomically complex cases with challenging vascular supply, three-dimensional (3D) reconstructions can provide further detail, supporting optimal surgical planning [13]. In patients with contraindications to CT or in cases where the presence of a tumor thrombus is suspected, magnetic resonance imaging (MRI) with contrast administration represents a suitable alternative [14,15].

Future advances in 3D modeling, augmented reality, and CT or MRI-based intraoperative navigation may further improve surgical techniques and allow greater individualization of vascular approaches [16,17].

### Vascular clamping strategy

One of the key determinants of postoperative renal function is the duration and extent of warm ischemia. In selected patients, off-clamp or selective clamping techniques may reduce ischemic injury to the renal parenchyma [18–20]. Ideally, the duration of warm ischemia should not exceed 25 minutes in order to preserve postoperative kidney function as much as possible [21,22]. Nonetheless, some studies (e.g., Sharma et al.) have shown no significant differences in renal function outcomes between different clamping strategies [23]. In our cohort, selective clamping was performed significantly more frequently in patients undergoing intraoperative perfusion assessment using DUSG or ICG. Similarly, the need for intraoperative clamp adjustment was significantly higher in these groups, particularly in the ICG cohort. These findings suggest that intraoperative perfusion imaging may improve the identification of incomplete ischemia and facilitate immediate correction of vascular control during selective clamping. A statistically significant difference in postoperative eGFR was observed in the ICG group. Nevertheless, evaluation of renal functional outcomes was limited by the absence of consistently available

preoperative renal function data, which prevented assessment of postoperative renal function decline. Furthermore, the ICG cohort was relatively small and consisted of significantly younger patients, both of which may have influenced postoperative eGFR values.

### **Intraoperative imaging techniques**

The refinement of minimally invasive surgical techniques is aimed at three key objectives: reducing the duration of warm ischemia, ensuring oncological radicality (negative surgical margins), and minimizing intraoperative complications [24]. To support these goals, intraoperative imaging modalities are increasingly employed. Commonly used methods include Doppler ultrasonography (DUSG), contrast-enhanced ultrasonography (CEUS), and indocyanine green (ICG) fluorescence technology [25–27]. In our cohort, intraoperative perfusion imaging was preferentially used in anatomically complex cases, which likely contributed to the higher frequency of clamp adjustments observed in both the DUSG and ICG groups.

Recent research has also explored other fluorescent agents, such as OTL38 (On Target Laboratories LLC., West Lafayette, IN, USA), which targets folate receptors and demonstrates distinct fluorescence patterns between tumor and normal tissue [28]. Additional experimental agents are being investigated to enhance intraoperative tumor detection and improve assessment of resection radicality, even in endophytic lesions [29,30]. In parallel, advanced technologies such as 3D modeling and augmented reality are under development, enabling CT-based spatial reconstructions of the kidney to be projected directly into the surgical field and thereby improving intraoperative navigation [16,17,31].

### **Selective clamping of the renal artery**

One of the key determinants of postoperative renal function is the duration of warm ischemia (WIT). The strategy of selectively clamping segmental branches of the renal artery was developed specifically to minimize ischemic damage to the parenchyma. In such cases, intraoperative visualization of perfusion can be of substantial benefit. Doppler ultrasonography (DUSG) has long been used in partial nephrectomy. It enables more precise tumor localization, identification of vascular structures, and detection of accessory arteries not visualized during preoperative imaging (Fig. 1). Several studies have demonstrated that DUSG can shorten ischemia time and enhance procedural safety without increasing morbidity [32–35]. According to Hyams et al., Doppler mapping also facilitates faster hilar dissection and, in some cases, leads to intraoperative adjustment of vascular clamps during selective clamping [36].

The use of ICG is becoming increasingly widespread, particularly in robotic surgery, where it provides detailed real-time visualization of perfusion with high sensitivity and without requiring tissue contact (Fig. 2) [37]. Fluorescence imaging with ICG has been shown to reduce ischemia time and increase the accuracy of vascular clamping, as reported by Krane et al. and Yang et al. [38–40]. Similar findings were described by Wang et al., who demonstrated particular advantages of ICG in patients with higher RENAL scores [41].

Both DUSG and ICG represent effective methods for intraoperative perfusion monitoring, although each technique has specific advantages and limitations. DUSG is inexpensive, widely available, and does not require specialized equipment. Conversely, ICG fluorescence imaging offers highly sensitive visualization of tissue perfusion but requires dedicated near-infrared imaging systems and administration of a contrast agent. Although ICG is generally considered safe and severe adverse events are rare, allergic, anaphylactic, and cardiovascular reactions, including hypotension and tachycardia, have been described in the literature, particularly in patients with hypersensitivity to iodinated compounds or after higher cumulative doses [42–44]. Importantly, DUSG may represent a practical alternative for centers without access to fluorescence imaging technology.

Several limitations of this study should be acknowledged. First, this was a retrospective single-center analysis and therefore subject to selection bias. The choice of intraoperative imaging modality was left to the discretion of the operating surgeon. In addition, the ICG cohort was relatively small and markedly unbalanced compared with the DUSG and control groups, which limits the statistical power and robustness of comparisons involving ICG and may have influenced some observed differences. Second, robotic surgery was gradually introduced during the study period, representing a potential source of confounding and therefore prompting separate subgroup analyses for laparoscopic and robot-assisted procedures. Finally, the absence of complete preoperative renal function data prevented evaluation of postoperative renal function decline and limited interpretation of eGFR outcomes.

### **CONCLUSION**

Our findings confirm that DUSG and fluorescence imaging with ICG are both reliable and safe techniques for intraoperative assessment of renal perfusion during PN. Both modalities allow for early detection of incomplete ischemia and timely correction of vascular clamping, without compromising the oncological radicality of the procedure.

Although ICG fluorescence imaging is increasingly integrated into robotic surgery platforms, DUSG remains a simple, widely available, and cost-effective technique that can be readily implemented in routine clinical practice, including centers without access to near-infrared fluorescence technology. Despite the retrospective design and potential selection bias, our findings support DUSG as a valid alternative for intraoperative ischemia verification during partial nephrectomy.

#### **STATEMENT OF ETHICS**

This study was conducted in accordance with the Declaration of Helsinki and approved by Ethics Committee of The University Hospital and the Faculty of Medicine, Charles University in Pilsen - approval: 182/25. The study was not registered as a clinical trial because it was a retrospective observational analysis. The requirement for informed consent was waived by the ethics committee due to the retrospective, non-interventional design of the study and the use of anonymized data.

#### **CONFLICT OF INTEREST STATEMENT**

The authors declare no conflicts of interest.

#### **FUNDING SOURCES**

Supported by Charles University Prague, Faculty of Medicine Pilsen (Cooperatio Program, SURG), and Institutional Research of the University Hospital Pilsen (FNPI 00669806).

#### **AUTHOR CONTRIBUTIONS**

Adriana Bartoš Veselá contributed to study conceptualization, methodology, data analysis, and writing of the original draft.

Milan Hora contributed to study conceptualization, supervision of the project, and critical revision of the manuscript.

Hana Sedláčková contributed to manuscript revision and editing of early drafts.

Jiří Kolář, Tomáš Pitra, Petr Stránský Jr., Tomáš Ůrge, and Ivan Trávníček contributed to patient care, data acquisition, and clinical support essential for this study.

Jiří Ferda and Kristýna Pivovarová contributed domain-specific expertise and provided access to data from collaborating specialties.

All authors reviewed and approved the final version of the manuscript.

#### **DATA AVAILABILITY STATEMENT**

The datasets generated and analyzed during the current study are not publicly available due to GDPR and patient privacy restrictions, but are available from the corresponding author on reasonable request.

#### **REFERENCES**

1. Bray F, Laversanne M, Sung H, Ferlay J, Siegel RL, Soerjomataram I, et al. Global cancer statistics 2022: GLOBOCAN estimates of incidence and mortality worldwide for 36 cancers in 185 countries. *CA: A Cancer Journal for Clinicians*. 2024;74:229–63.
2. Znaor A, Lortet-Tieulent J, Laversanne M, Jemal A, Bray F. International Variations and Trends in Renal Cell Carcinoma Incidence and Mortality. *European Urology*. 2015;67:519–30.
3. Rose TL, Kim WY. Renal Cell Carcinoma. *JAMA*. 2024;332:1001–10.
4. Aboumarzouk OM, Stein RJ, Eyraud R, Haber GP, Chlostka PL, Somani BK, et al. Robotic Versus Laparoscopic Partial Nephrectomy: A Systematic Review and Meta-Analysis. *European Urology*. 2012;62:1023–33.
5. Ruiz Guerrero E, Claro AVO, Ledo Cepero MJ, Soto Delgado M, Álvarez-Ossorio Fernández JL. Robotic versus Laparoscopic Partial Nephrectomy in the New Era: Systematic Review. *Cancers (Basel)*. 2023;15:1793.
6. Jiang YL, Yu D, Xu Y, Zhang MH, Peng FS, Li P. Comparison of perioperative outcomes of robotic vs. laparoscopic partial nephrectomy for renal tumors with a RENAL nephrometry score  $\geq 7$ : A meta-analysis. *Front Surg*. 2023;10:1138974.
7. Capitanio U, Terrone C, Antonelli A, Minervini A, Volpe A, Furlan M, et al. Nephron-sparing techniques independently decrease the risk of cardiovascular events relative to radical nephrectomy in patients with a T1a-T1b renal mass and normal preoperative renal function. *Eur Urol*. 2015;67:683–9.
8. MacLennan S, Imamura M, Lapitan MC, Omar MI, Lam TBL, Hilvano-Cabungcal AM, et al. Systematic review of perioperative and quality-of-life outcomes following surgical management of localised renal cancer. *Eur Urol*. 2012;62:1097–117.
9. Antonelli A, Cindolo L, Sandri M, Veccia A, Annino F, Bertagna F, et al. Is off-clamp robot-assisted partial nephrectomy beneficial for renal function? Data from the CLOCK trial. *BJU International*. 2022;129:217–24.

10. Desai MM, de Castro Abreu AL, Leslie S, Cai J, Huang EYH, Lewandowski PM, et al. Robotic partial nephrectomy with superselective versus main artery clamping: a retrospective comparison. *Eur Urol*. 2014;66:713–9.
11. Bex A, Ghanem YA, Albiges L, Bonn S, Campi R, Capitanio U, et al. European Association of Urology Guidelines on Renal Cell Carcinoma: The 2025 Update. *European Urology*. 2025;87:683–96.
12. Ljungberg B, Bensalah K, Canfield S, Dabestani S, Hofmann F, Hora M, et al. EAU Guidelines on Renal Cell Carcinoma: 2014 Update. *European Urology*. 2015;67:913–24.
13. Ferda J, Hora M, Hes O, Ferdová E, Kreuzberg B. Assessment of the kidney tumor vascular supply by two-phase MDCT-angiography. *Eur J Radiol*. 2007;62:295–301.
14. Elstob A, Gonsalves M, Patel U. Diagnostic modalities. *Int J Surg*. 2016;36:504–12.
15. Hora M, Stránský P, Trávníček I, Üрге T, Eret V, Kreuzberg B, et al. Three-tesla MRI biphasic angiography: a method for preoperative assessment of the vascular supply in renal tumours—a surgical perspective. *World J Urol*. 2013;31:1171–6.
16. Checcucci E, De Cillis S, Porpiglia F. 3D-printed models and virtual reality as new tools for image-guided robot-assisted nephron-sparing surgery: a systematic review of the newest evidences. *Current Opinion in Urology*. 2020;30:55.
17. Porpiglia F, Checcucci E, Amparore D, Piramide F, Volpi G, Granato S, et al. Three-dimensional Augmented Reality Robot-assisted Partial Nephrectomy in Case of Complex Tumours (PADUA  $\geq 10$ ): A New Intraoperative Tool Overcoming the Ultrasound Guidance. *Eur Urol*. 2020;78:229–38.
18. Shao P, Tang L, Li P, Xu Y, Qin C, Cao Q, et al. Precise Segmental Renal Artery Clamping Under the Guidance of Dual-source Computed Tomography Angiography During Laparoscopic Partial Nephrectomy. *European Urology*. 2012;62:1001–8.
19. Bertolo R, Pecoraro A, Carbonara U, Amparore D, Diana P, Muselaers S, et al. Resection Techniques During Robotic Partial Nephrectomy: A Systematic Review. *Eur Urol Open Sci*. 2023;52:7–21.
20. Antonelli A, Veccia A, Francavilla S, Bertolo R, Bove P, Hampton LJ, et al. On-clamp versus off-clamp robotic partial nephrectomy: A systematic review and meta-analysis. *Urologia*. 2019;86:52–62.
21. Li S, Guo Z, Li Y, Chan FL, Wang S, Gu C. The impact of warm ischemia time on short-term renal function after partial nephrectomy: a systematic review and meta-analysis. *BMC Urology*. 2025;25:121.
22. Choi JD, Park JW, Lee SY, Jeong BC, Jeon SS, Lee HM, et al. Does Prolonged Warm Ischemia After Partial Nephrectomy Under Pneumoperitoneum Cause Irreversible Damage to the Affected Kidney? *The Journal of Urology*. 2012. Located at: Philadelphia, PA.
23. Sharma G, Shah M, Ahluwalia P, Dasgupta P, Challacombe BJ, Bhandari M, et al. Off-clamp Versus On-clamp Robot-assisted Partial Nephrectomy: A Propensity-matched Analysis. *Eur Urol Oncol*. 2023;6:525–30.
24. Kim DK, Kim LHC, Raheem AA, Shin TY, Alabdulaali I, Yoon YE, et al. Comparison of Trifecta and Pentafecta Outcomes between T1a and T1b Renal Masses following Robot-Assisted Partial Nephrectomy (RAPN) with Minimum One Year Follow Up: Can RAPN for T1b Renal Masses Be Feasible? *PLoS One*. 2016;11:e0151738.
25. Mitsui Y, Shiina H, Arichi N, Hiraoka T, Inoue S, Sumura M, et al. Indocyanine green (ICG)-based fluorescence navigation system for discrimination of kidney cancer from normal parenchyma: application during partial nephrectomy. *Int Urol Nephrol*. 2012;44:753–9.
26. Bjurlin MA, McClintock TR, Stifelman MD. Near-Infrared Fluorescence Imaging with Intraoperative Administration of Indocyanine Green for Robotic Partial Nephrectomy. *Curr Urol Rep*. 2015;16:20.
27. Zhang Y, Ouyang W, Wu B, Pokhrel G, Ding B, Xu H, et al. Robot-assisted partial nephrectomy with a standard laparoscopic ultrasound probe in treating endophytic renal tumor. *Asian Journal of Surgery*. 2020;43:423–7.
28. Sulek JE, Steward JE, Bahler CD, Jacobsen MH, Sundaram A, Shum CF, et al. Folate-targeted intraoperative fluorescence, OTL38, in robotic-assisted laparoscopic partial nephrectomy. *Scand J Urol*. 2021;55:331–6.
29. Hekman MCH, Boerman OC, de Weijert M, Bos DL, Oosterwijk E, Langenhuijsen HF, et al. Targeted Dual-Modality Imaging in Renal Cell Carcinoma: An Ex Vivo Kidney Perfusion Study. *Clinical Cancer Research*. 2016;22:4634–42.
30. Povoski SP, Hall NC, Murrey DA, Sharp DS, Hitchcock CL, Mojzisek CM, et al. Multimodal Imaging and Detection Strategy With 124 I-Labeled Chimeric Monoclonal Antibody cG250 for Accurate Localization and Confirmation of Extent of Disease During Laparoscopic and Open Surgical Resection of Clear Cell Renal Cell Carcinoma. *Surg Innov*. 2013;20:59–69.

31. Drewniak T, Rzepecki M, Juszcak K, Kwiatek W, Bielecki J, Zieliński K, et al. [Augmented reality for image guided therapy (ARIGT) of kidney tumor during nephron sparing surgery (NSS): animal model and clinical approach]. *Folia Med Cracov.* 2011;51:77–90.
32. Hekman MCH, Rijpkema M, Langenhuijsen JF, Boerman OC, Oosterwijk E, Mulders PFA. Intraoperative Imaging Techniques to Support Complete Tumor Resection in Partial Nephrectomy. *European Urology Focus.* 2018;4:960–8.
33. Di Cosmo G, Verzotti E, Silvestri T, Lissiani A, Knez R, Pavan N, et al. Intraoperative ultrasound in robot-assisted partial nephrectomy: State of the art. *Arch Ital Urol Androl.* 2018;90:195–8.
34. Senel S, Koudonas A, Ahmadzada J, Rassweiler J, Gözen AS. Is intraoperative ultrasonography necessary in laparoscopic partial nephrectomy for exophytic tumours? *Minim Invasive Ther Allied Technol.* 2023;32:341–4.
35. Ma T, Wang W, Zhang K, Yang W, Cui ZY. Application of Multi-Slice Spiral CT Renal Angiography Combined with Intraoperative Ultrasound in Laparoscopic Partial Nephrectomy. *J Coll Physicians Surg Pak.* 2024;34:1387–9.
36. Hyams ES, Perlmutter M, Stifelman MD. A Prospective Evaluation of the Utility of Laparoscopic Doppler Technology During Minimally Invasive Partial Nephrectomy. *Urology.* 2011;77:617–20.
37. Tobis S, Knopf J, Silvers C, Yao J, Rashid H, Wu G, et al. Near Infrared Fluorescence Imaging With Robotic Assisted Laparoscopic Partial Nephrectomy: Initial Clinical Experience for Renal Cortical Tumors. *The Journal of Urology.* 2011. Located at: Philadelphia, PA.
38. Katsimperis S, Tzelvels L, Bellos T, Manolitsis I, Mourmouris P, Kostakopoulos N, et al. The use of indocyanine green in partial nephrectomy: a systematic review. *Cent European J Urol.* 2024;77:15–21.
39. Krane LS, Manny TB, Hemal AK. Is Near Infrared Fluorescence Imaging Using Indocyanine Green Dye Useful in Robotic Partial Nephrectomy: A Prospective Comparative Study of 94 Patients. *Urology.* 2012;80:110–8.
40. Yang YK, Hsieh ML, Chen SY, Liu CY, Lin PH, Kan HC, et al. Clinical Benefits of Indocyanine Green Fluorescence in Robot-Assisted Partial Nephrectomy. *Cancers (Basel).* 2022;14:3032.
41. Wang R, Tang J, Chen Y, Fang Z, Shen J. The clinical value of indocyanine green fluorescence navigation system for laparoscopic partial nephrectomy in the case of complex renal clear cell carcinoma (R.E.N.A.L score  $\geq 7$ ). *J Cancer.* 2021;12:1764–9.
42. Keller NB, Stapler SJM, Shanker BA, Cleary RK. Anaphylactic Shock to Intravenous Indocyanine Green During a Robotic Right Colectomy. *Am Surg.* 2023;89:6407–9.
43. Abdelrahman H, El-Menyar A, Peralta R, Al-Thani H. Application of indocyanine green in surgery: A review of current evidence and implementation in trauma patients. *World J Gastrointest Surg.* 2023;15:757–75.
44. Gopal S. Anaphylaxis during intraoperative indocyanine green angiography: A complication to watch out. *Journal of Neuroanaesthesiology and Critical Care.* 2016;3:274.

## FIGURE LEGENDS

### **Fig. 1. Verification of renal perfusion using Doppler ultrasonography (DUSG).**

- (a) Perioperative ultrasonography of the renal tumor.
- (b) Duplex renal artery and selective clamping.
- (c) Doppler signal confirming residual blood flow.

### **Fig. 2. Verification of renal perfusion using indocyanine green (ICG) fluorescence imaging.**

- (a) Renal tumor and duplex renal artery during hilar dissection.
- (b) Perfusion boundary visualized using ICG fluorescence imaging.

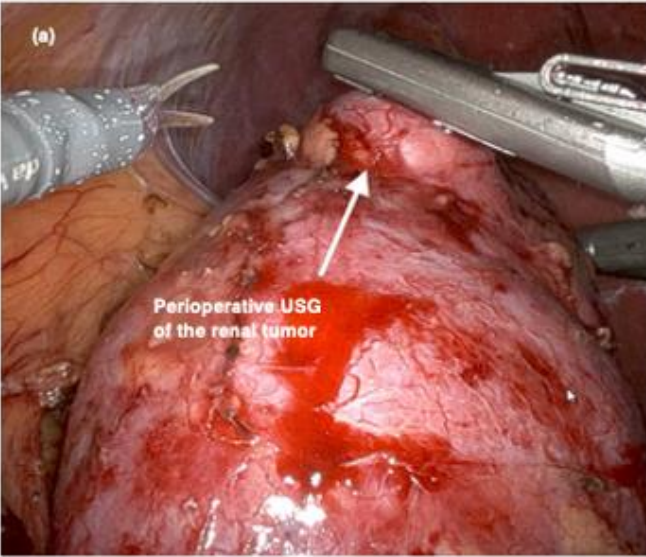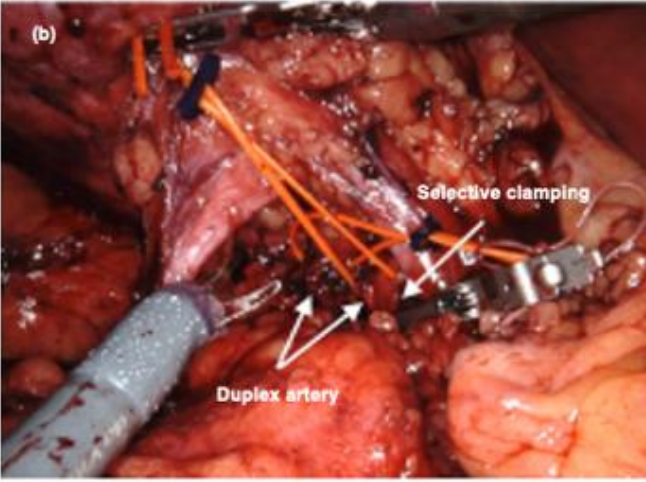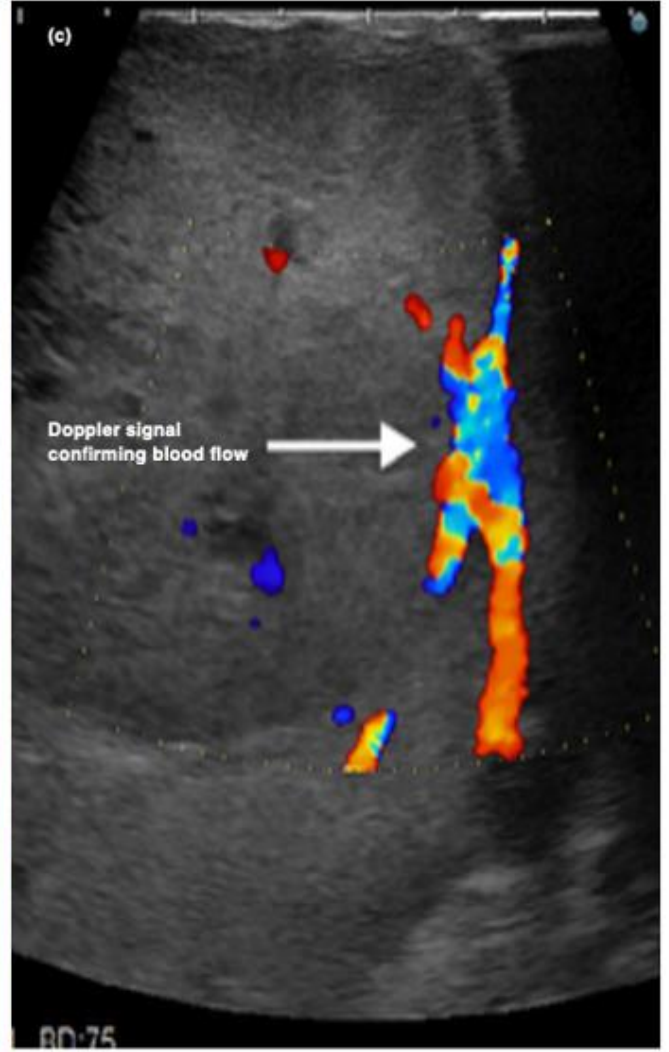

Accepted

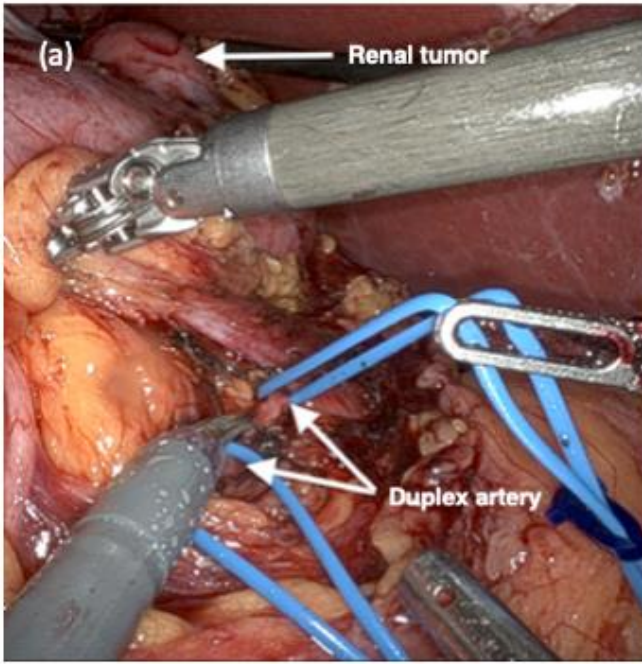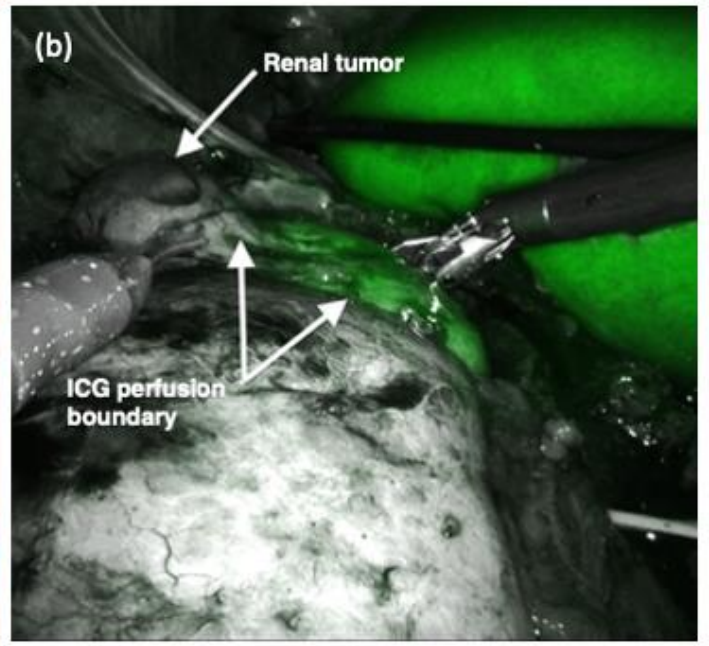

Accepted Manuscript

**Table 1. Histological Subtypes of Operated Tumors**

| <b>Histological subtype</b>                                   | <b>n</b> | <b>%</b> |
|---------------------------------------------------------------|----------|----------|
| Clear cell renal cell carcinoma                               | 247      | 58%      |
| Papillary renal cell carcinoma                                | 69       | 16%      |
| Renal oncocytoma                                              | 37       | 9%       |
| Chromophobe renal cell carcinoma                              | 17       | 4%       |
| Angiomyolipoma                                                | 19       | 4%       |
| Benign lesions                                                | 11       | 3%       |
| Multilocular cystic renal neoplasm of low malignant potential | 5        | 1%       |
| Eosinophilic, solid and cystic renal cell carcinoma           | 5        | 1%       |
| Low-grade Oncocytic Tumor                                     | 3        | 1%       |
| ELOC-mutated renal cell carcinoma                             | 1        | 0%       |
| Others                                                        | 12       | 3%       |

**Table 2. Overall cohort characteristics**Values are presented as mean  $\pm$  SD or n (%)

| Parameter                          | DUSG (n=174)                    | ICG (n=29)                     | CG (n=223)                      | p-value          |
|------------------------------------|---------------------------------|--------------------------------|---------------------------------|------------------|
| Age (years)                        | 64.16 $\pm$ 10.59 <sup>a</sup>  | 57.28 $\pm$ 12.50 <sup>b</sup> | 65.52 $\pm$ 10.29 <sup>a</sup>  | <b>&lt;0.001</b> |
| BMI (kg/m <sup>2</sup> )           | 30.27 $\pm$ 5.41                | 28.84 $\pm$ 3.91               | 29.87 $\pm$ 4.99                | 0.352            |
| Tumor size (mm)                    | 30.25 $\pm$ 11.88               | 29.86 $\pm$ 10.96              | 30.46 $\pm$ 11.58               | 0.960            |
| Time of surgery (min)              | 118.39 $\pm$ 27.60 <sup>a</sup> | 99.76 $\pm$ 25.63 <sup>b</sup> | 112.33 $\pm$ 28.01 <sup>a</sup> | <b>0.002</b>     |
| Warm ischemia time (min)           | 15.39 $\pm$ 5.39                | 15.21 $\pm$ 4.85               | 15.34 $\pm$ 5.50                | 0.985            |
| Blood loss (ml)                    | 136.58 $\pm$ 165.09             | 152.07 $\pm$ 197.31            | 141.61 $\pm$ 194.23             | 0.903            |
| eGFR (ml/min/1.73 m <sup>2</sup> ) | 67.26 $\pm$ 22.26 <sup>a</sup>  | 77.62 $\pm$ 23.52 <sup>b</sup> | 67.15 $\pm$ 17.99 <sup>a</sup>  | <b>0.046</b>     |
| Clavien–Dindo                      | 1.40 $\pm$ 0.72                 | 1.34 $\pm$ 0.67                | 1.30 $\pm$ 0.58                 | 0.376            |
| RENAL score                        | 6.59 $\pm$ 1.92                 | 6.83 $\pm$ 1.79                | 6.61 $\pm$ 1.93                 | 0.832            |
| Selective clamping                 | 47 (27.0%)                      | 14 (48.3%)                     | 23 (10.3%)                      | <b>&lt;0.001</b> |
| Reclamping                         | 41 (23.6%)                      | 18 (62.1%)                     | 6 (2.7%)                        | <b>&lt;0.001</b> |
| pR1                                | 12 (6.9%)                       | 3 (10.3%)                      | 28 (12.6%)                      | 0.178            |

Continuous variables were analyzed using one-way ANOVA with Tukey post-hoc analysis. Categorical variables were compared using the chi-square test. Different superscripts (a,b) indicate statistically significant differences between groups in post-hoc analysis.

**Table 3. Laparoscopic subgroup**Values are presented as mean  $\pm$  SD or n (%)

| Parameter                          | DUSG (n=22)                  | ICG (n=20)                   | CG (n=107)                   | p-value          |
|------------------------------------|------------------------------|------------------------------|------------------------------|------------------|
| Age (years)                        | 64.84 $\pm$ 11.82            | 59.39 $\pm$ 12.97            | 66.14 $\pm$ 9.42             | <b>0.029</b>     |
| BMI (kg/m <sup>2</sup> )           | 30.05 $\pm$ 5.46             | 29.18 $\pm$ 3.66             | 30.25 $\pm$ 4.89             | 0.663            |
| Tumor size (mm)                    | 31.59 $\pm$ 9.96             | 31.10 $\pm$ 11.51            | 28.52 $\pm$ 10.14            | 0.319            |
| Time of surgery (min)              | 93.45 $\pm$ 18.82            | 93.25 $\pm$ 23.39            | 103.40 $\pm$ 28.70           | 0.123            |
| Warm ischemia time (min)           | 14.91 $\pm$ 4.30             | 14.20 $\pm$ 4.26             | 15.23 $\pm$ 5.77             | 0.729            |
| Blood loss (ml)                    | 151.6 $\pm$ 159.4            | 140.0 $\pm$ 185.6            | 121.3 $\pm$ 177.1            | 0.725            |
| eGFR (ml/min/1.73 m <sup>2</sup> ) | 70.17 $\pm$ 26.10            | 78.85 $\pm$ 22.60            | 67.98 $\pm$ 17.80            | 0.118            |
| Clavien-Dindo                      | 1.77 $\pm$ 1.10 <sup>a</sup> | 1.30 $\pm$ 0.47 <sup>b</sup> | 1.29 $\pm$ 0.55 <sup>b</sup> | <b>0.007</b>     |
| RENAL score                        | 6.50 $\pm$ 1.74              | 6.95 $\pm$ 1.64              | 6.68 $\pm$ 1.86              | 0.720            |
| Selective clamping                 | 5 (22.7%)                    | 9 (45.0%)                    | 11 (10.3%)                   | <b>&lt;0.001</b> |
| Reclamping                         | 6 (27.3%)                    | 13 (65.0%)                   | 3 (2.8%)                     | <b>&lt;0.001</b> |
| pR1                                | 0 (0%)                       | 2 (10.0%)                    | 12 (11.2%)                   | 0.258            |

Continuous variables were analyzed using one-way ANOVA with Tukey post-hoc analysis. Categorical variables were compared using the chi-square test. Different superscripts (a,b) indicate statistically significant differences between groups in post-hoc analysis.

**Table 4. Robot-assisted subgroup**Values are presented as mean  $\pm$  SD or n (%)

| Parameter                          | DUSG (n=152)                   | ICG (n=9)                      | CG (n=116)                     | p-value          |
|------------------------------------|--------------------------------|--------------------------------|--------------------------------|------------------|
| Age (years)                        | 64.06 $\pm$ 10.44 <sup>a</sup> | 52.60 $\pm$ 10.58 <sup>b</sup> | 64.95 $\pm$ 11.04 <sup>a</sup> | <b>0.004</b>     |
| BMI (kg/m <sup>2</sup> )           | 30.30 $\pm$ 5.42               | 28.10 $\pm$ 4.55               | 29.53 $\pm$ 5.06               | 0.282            |
| Tumor size (mm)                    | 30.06 $\pm$ 12.15              | 27.11 $\pm$ 9.68               | 32.25 $\pm$ 12.54              | 0.228            |
| Time of surgery (min)              | 121.99 $\pm$ 26.83             | 114.22 $\pm$ 25.68             | 120.54 $\pm$ 24.76             | 0.649            |
| Warm ischemia time (min)           | 15.46 $\pm$ 5.54               | 17.44 $\pm$ 5.57               | 15.44 $\pm$ 5.26               | 0.556            |
| Blood loss (ml)                    | 134.4 $\pm$ 166.3              | 178.9 $\pm$ 230.7              | 160.3 $\pm$ 207.8              | 0.463            |
| eGFR (ml/min/1.73 m <sup>2</sup> ) | 66.90 $\pm$ 21.81              | 75.00 $\pm$ 26.79              | 66.43 $\pm$ 18.20              | 0.524            |
| Clavien-Dindo                      | 1.34 $\pm$ 0.63                | 1.44 $\pm$ 1.01                | 1.32 $\pm$ 0.61                | 0.837            |
| RENAL score                        | 6.61 $\pm$ 1.95                | 6.56 $\pm$ 2.19                | 6.56 $\pm$ 2.00                | 0.981            |
| Selective clamping                 | 42 (27.6%)                     | 5 (55.6%)                      | 12 (10.3%)                     | <b>&lt;0.001</b> |
| Reclamping                         | 35 (23.0%)                     | 5 (55.6%)                      | 3 (2.6%)                       | <b>&lt;0.001</b> |
| pR1                                | 12 (7.9%)                      | 1 (11.1%)                      | 16 (13.8%)                     | 0.294            |

Continuous variables were analyzed using one-way ANOVA with Tukey post-hoc analysis. Categorical variables were compared using the chi-square test. Different superscripts (a,b) indicate statistically significant differences between groups in post-hoc analysis.
